# Supplementary material for: Amide-imide tautomerism of acetohydroxamic acid in aqueous solution: quantum calculation and SMD simulations
Source: Royal Society of Chemistry journal article supplement (doi:10.1039/c4ra06124a), 2014-01-01
Supplement: c4ra06124a1.pdf [file c4ra06124a1.pdf]

## Supporting Information

(Total pages: 11)

### **Amide-Imide Tautomerism of Acetohydroxamic Acid in Aqueous Solution: Quantum Calculation and SMD Simulations**

S. Tolosa<sup>a\*</sup>, N. Mora-Diez<sup>b\*</sup>, A. Hidalgo<sup>a</sup>, J.A. Sansón<sup>a</sup>

<sup>a</sup> Departamento de Ingeniería Química y Química Física, Universidad de Extremadura, Badajoz, Spain.

<sup>b</sup> Department of Chemistry, Thompson Rivers University, Kamloops, BC, V2C 0C8, Canada.

\* Corresponding authors: santi@unex.es, nmora@tru.ca

**Table S1.** Calculated thermodynamic data (in aqueous solution at 298.15 K, reported in atomic units unless otherwise indicated) for the stationary points considered in this study.

|                 | M06-2X-SMD/6-311++G(d,p) |                    |                          | MP2-PCM/6-311++G(d,p) |                    |                  |                  | QCISD-PCM/cc-pVDZ//<br>MP2-PCM/6-311++G(d,p) |                |
|-----------------|--------------------------|--------------------|--------------------------|-----------------------|--------------------|------------------|------------------|----------------------------------------------|----------------|
| (au)            | $\Delta G^\circ_f$       | $\Delta H^\circ_f$ | $\Delta G^\circ_f$ (gas) | $\Delta G^\circ_f$    | $\Delta H^\circ_f$ | TCG <sup>a</sup> | TCH <sup>b</sup> | $\Delta G_{\text{sol}}$ <sup>c</sup>         | E <sup>d</sup> |
| EA              | -284.31350               | -284.27817         | -283.67181               | -283.68286            | -283.64739         | 0.05004          | 0.08551          | -6.9                                         | -283.64686     |
| TS1             | -284.24502               | -284.21096         | -283.60948               | -283.61832            | -283.58257         | 0.04415          | 0.07990          | -5.6                                         | -283.57405     |
| EI              | -284.30317               | -284.26786         | -283.66669               | -283.67426            | -283.63809         | 0.04875          | 0.08492          | -4.7                                         | -283.63724     |
| EAW             | -360.73493               | -360.69152         | -359.94043               | -359.95398            | -359.91022         | 0.06956          | 0.11332          | -8.5                                         | -359.90362     |
| TS2             | -360.70585               | -360.66658         | -359.91148               | -359.92446            | -359.88488         | 0.06522          | 0.10481          | -8.2                                         | -359.86852     |
| EIW             | -360.72558               | -360.68298         | -359.93625               | -359.94835            | -359.90363         | 0.06811          | 0.11283          | -7.6                                         | -359.89754     |
| ZA              | -284.31549               | -284.28000         | -283.67097               | -283.68470            | -283.64861         | 0.04956          | 0.08565          | -8.6                                         | -283.64593     |
| TS3             | -284.28917               | -284.25478         | -283.65085               | -283.66156            | -283.62708         | 0.04967          | 0.08415          | -6.8                                         | -283.62667     |
| TS4             | -284.29612               | -284.26172         | -283.65103               | -283.66550            | -283.63141         | 0.04693          | 0.08102          | -9.0                                         | -283.62203     |
| Z <sup>±</sup>  | -284.29779               | -284.26342         | -283.64953               | -283.66439            | -283.62974         | 0.05055          | 0.08520          | -9.3                                         | -283.62359     |
| TS5             | -284.22671               | -284.19129         | -283.59014               | -283.59909            | -283.56400         | 0.04406          | 0.07914          | -5.6                                         | -283.55180     |
| ZI              | -284.30689               | -284.27212         | -283.67175               | -283.67912            | -283.64400         | 0.05005          | 0.08517          | -4.6                                         | -283.64319     |
| ZAW             | -360.73663               | -360.69212         | -359.93742               | -359.95670            | -359.91009         | 0.06636          | 0.11297          | -12.1                                        | -359.89844     |
| TS6             | -360.71927               | -360.67611         | -359.91838               | -359.93968            | -359.89605         | 0.06549          | 0.10912          | -13.4                                        | -359.87748     |
| ZW <sup>±</sup> | -360.72062               | -360.67942         | -359.92218               | -359.93974            | -359.89556         | 0.06924          | 0.11342          | -13.8                                        | -359.88105     |
| TS7             | -360.69046               | -360.65090         | -359.89406               | -359.90925            | -359.86962         | 0.06657          | 0.10620          | -9.5                                         | -359.84965     |
| ZIW             | -360.73087               | -360.68735         | -359.93963               | -359.95339            | -359.90916         | 0.06902          | 0.11325          | -8.6                                         | -359.90111     |

<sup>a</sup> Thermal correction to the Gibbs free energy; <sup>b</sup> Thermal correction to the enthalpy; <sup>c</sup> In kcal/mol; <sup>d</sup> Uncorrected energy.

**Table S2.** Enthalpy changes (in kcal/mol) along the reaction profile of the five transformations studied from electronic structure calculations in solution.

|     |                 | M06-2X-SMD | MP2-PCM | QCISD-PCM//<br>MP2-PCM |
|-----|-----------------|------------|---------|------------------------|
| (a) | EA              | 0.0        | 0.0     | 0.0                    |
|     | TS1             | 42.2       | 40.7    | 42.2                   |
|     | EI              | 6.5        | 5.8     | 5.7                    |
| (b) | EAW             | 0.0        | 0.0     | 0.0                    |
|     | TS2             | 15.6       | 15.9    | 16.7                   |
|     | EIW             | 5.4        | 4.1     | 3.5                    |
| (c) | ZA              | 0.0        | 0.0     | 0.0                    |
|     | TS3             | 15.8       | 13.5    | 11.1                   |
|     | EA              | 1.1        | 0.8     | -0.7                   |
|     | TS1             | 43.3       | 41.4    | 41.5                   |
|     | EI              | 7.6        | 6.6     | 5.0                    |
| (d) | ZA              | 0.0        | 0.0     | 0.0                    |
|     | TS4             | 11.5       | 10.8    | 12.1                   |
|     | Z <sup>±</sup>  | 10.4       | 11.8    | 13.7                   |
|     | TS5             | 55.7       | 53.1    | 55.0                   |
|     | ZI              | 4.9        | 2.9     | 1.4                    |
| (e) | ZAW             | 0.0        | 0.0     | 0.0                    |
|     | TS6             | 10.0       | 8.8     | 10.7                   |
|     | ZW <sup>±</sup> | 8.0        | 9.1     | 11.2                   |
|     | TS7             | 25.9       | 25.4    | 26.4                   |
|     | ZIW             | 3.0        | 0.6     | -1.5                   |

**Table S3.** Equilibrium constants (K) calculated in the gas phase and in solution for each of the Imide  $\rightleftharpoons$  Amide elementary steps and global processes studied at 298.15 K.

|                                                | MP2                  | M06-2X                | QCISD-PCM//<br>MP2-PCM | MP2-PCM             | M06-2X-SMD          | SMD                 |
|------------------------------------------------|----------------------|-----------------------|------------------------|---------------------|---------------------|---------------------|
| (a) EI $\rightleftharpoons$ EA (TS1)           | $2.3 \cdot 10^2$     | 94                    | $6.8 \cdot 10^3$       | $9.0 \cdot 10^3$    | $5.6 \cdot 10^4$    | $4.4 \cdot 10^5$    |
| (b) EIW $\rightleftharpoons$ EAW (TS2)         | 83                   | 33                    | $1.3 \cdot 10^2$       | $3.9 \cdot 10^2$    | $2.0 \cdot 10^4$    | 57                  |
| (c) EA $\rightleftharpoons$ ZA (TS3)           | 0.41                 | $7.94 \cdot 10^{-2}$  | 0.62                   | 7.0                 | 8.2                 | 68                  |
| <b>EI <math>\rightleftharpoons</math> ZA</b>   | 93                   | 7.4                   | $4.2 \cdot 10^3$       | $6.4 \cdot 10^4$    | $4.6 \cdot 10^5$    | $3.0 \cdot 10^7$    |
| <b>EIW <math>\rightleftharpoons</math> ZAW</b> | 3.4                  | 37                    | 17                     | $7.0 \cdot 10^3$    | $1.2 \cdot 10^5$    |                     |
| (d) ZI $\rightleftharpoons$ Z $^\pm$ (TS5)     | $6.0 \cdot 10^{-11}$ | $2.74 \cdot 10^{-11}$ | $5.7 \cdot 10^{-10}$   | $1.7 \cdot 10^{-7}$ | $6.5 \cdot 10^{-5}$ | $4.5 \cdot 10^{-6}$ |
| Z $^\pm$ $\rightleftharpoons$ ZA (TS4)         | $7.2 \cdot 10^9$     | $1.23 \cdot 10^9$     | $5.4 \cdot 10^{10}$    | $2.2 \cdot 10^9$    | $1.4 \cdot 10^8$    | $3.4 \cdot 10^9$    |
| <b>ZI <math>\rightleftharpoons</math> ZA</b>   | 0.44                 | $3.38 \cdot 10^{-2}$  | 31                     | $3.7 \cdot 10^2$    | $8.9 \cdot 10^3$    | $1.5 \cdot 10^4$    |
| (e) ZIW $\rightleftharpoons$ ZW $^\pm$ (TS7)   | $9.4 \cdot 10^{-9}$  | $2.98 \cdot 10^{-12}$ | $4.7 \cdot 10^{-10}$   | $5.1 \cdot 10^{-7}$ | $1.9 \cdot 10^{-5}$ | $2.3 \cdot 10^{-6}$ |
| ZW $^\pm$ $\rightleftharpoons$ ZAW (TS6)       | $1.0 \cdot 10^7$     | $1.95 \cdot 10^{12}$  | $2.1 \cdot 10^9$       | $6.5 \cdot 10^7$    | $2.3 \cdot 10^7$    | $2.7 \cdot 10^8$    |
| <b>ZIW <math>\rightleftharpoons</math> ZAW</b> | $9.7 \cdot 10^{-2}$  | 5.80                  | 1.0                    | 33                  | $4.5 \cdot 10^2$    | $6.1 \cdot 10^2$    |

**Table S4.** Calculated tunneling factors ( $\kappa$ ) and data used for these calculations at 298.15 K.<sup>a</sup>

|                                   | MP2-PCM/6-311++G(d,p) |            |                |          | M06-2X- SMD/6-311++G(d,p) |            |                |          | QCISD-PCM/cc-pVDZ//<br>MP2-PCM/6-311++G(d,p) |            |          |
|-----------------------------------|-----------------------|------------|----------------|----------|---------------------------|------------|----------------|----------|----------------------------------------------|------------|----------|
|                                   | $\Delta H^\ddagger$   | $\Delta H$ | $\nu^\ddagger$ | $\kappa$ | $\Delta H^\ddagger$       | $\Delta H$ | $\nu^\ddagger$ | $\kappa$ | $\Delta H^\ddagger$                          | $\Delta H$ | $\kappa$ |
| EA $\rightarrow$ EI (TS1)         | 40.67                 | 5.83       | 1842.0         | 4677.27  | 42.18                     | 6.47       | -1903.0        | 12820.54 | 42.17                                        | 5.67       | 6261.80  |
| EAW $\rightarrow$ EIW (TS2)       | 15.90                 | 4.14       | -1666.0        | 38.18    | 15.65                     | 5.35       | -1100.0        | 4.07     | 16.68                                        | 3.50       | 44.90    |
| ZA $\rightarrow$ Z $^\pm$ (TS4)   | 10.79                 | 11.84      | -964.0         | 1.00     | 11.47                     | 10.40      | -1232.0        | 2.01     | 12.09                                        | 13.74      | 1.00     |
| Z $^\pm$ $\rightarrow$ ZI (TS5)   | 41.25                 | -8.95      | -1771.0        | 4778.43  | 45.26                     | -5.46      | -1848.0        | 25160.31 | 41.24                                        | -12.33     | 5.00     |
| ZAW $\rightarrow$ ZW $^\pm$ (TS6) | 8.81                  | 9.10       | -1103.0        | 1.00     | 10.05                     | 7.97       | -1297.0        | 3.28     | 10.74                                        | 11.19      | 1.00     |
| ZW $^\pm$ $\rightarrow$ ZIW (TS7) | 16.30                 | -8.51      | -1230.0        | 7.10     | 17.90                     | -4.98      | -753.0         | 1.86     | 15.18                                        | -12.68     | 7.10     |

<sup>a</sup> Standard enthalpy of activation ( $\Delta H^\ddagger$ ) and enthalpy change ( $\Delta H$ ) of the forward reaction (in kcal/mol), imaginary frequency of the TS ( $\nu^\ddagger$ , in  $\text{cm}^{-1}$ ).

MP2-PCM/6-311++G(d,p) Cartesian coordinates of the optimized stationary points considered in this study.

C,0,-0.584055,-0.139875,0.016390  
O,0,-1.564885,-0.875196,-0.047779  
N,0,0.670720,-0.699719,0.166461  
H,0,0.762655,-1.646006,-0.189906  
O,0,1.770845,0.093509,-0.188251  
H,0,2.275293,0.169757,0.630701  
C,0,-0.648533,1.363570,0.017826  
H,0,-0.169447,1.753667,-0.883595  
H,0,-0.116461,1.771996,0.879668  
H,0,-1.694579,1.665498,0.043558

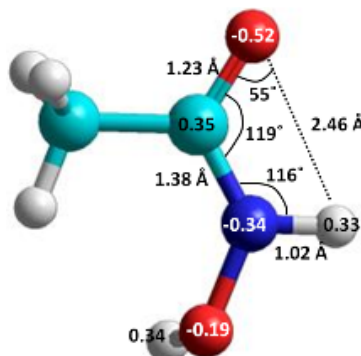

C,0,-0.981835,1.322801,0.013036  
H,0,-1.512716,1.521382,-0.920810  
H,0,-0.141752,2.010327,0.113928  
H,0,-1.681798,1.460417,0.840386  
C,0,-0.503748,-0.080062,0.016104  
O,0,-1.252956,-1.140926,-0.030091  
N,0,0.723938,-0.547451,0.075604  
H,0,0.010145,-1.621195,-0.050009  
O,0,1.847117,0.253497,-0.135166  
H,0,2.394942,0.098511,0.645828

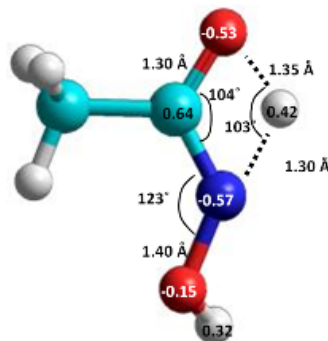

C,0,0.546723,1.407301,-0.004482  
H,0,0.648945,1.763579,1.024978  
H,0,-0.334159,1.869241,-0.448310  
H,0,1.441866,1.691847,-0.559645  
C,0,0.412767,-0.077880,-0.011954  
O,0,1.596204,-0.743092,0.000297  
N,0,-0.664085,-0.779070,-0.005548  
H,0,1.394782,-1.689639,0.044450  
O,0,-1.811052,0.046436,0.022900  
H,0,-2.520240,-0.595212,-0.092081

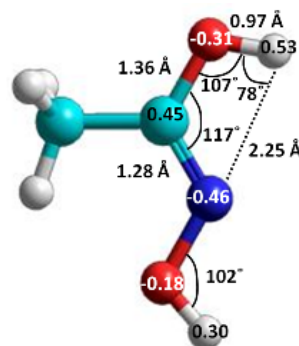

C,0,1.869108,-0.979903,0.141871  
H,0,2.212648,-0.589516,1.103135  
H,0,2.512003,-0.561250,-0.635273  
H,0,1.933077,-2.066974,0.137659  
C,0,0.435522,-0.585543,-0.081999  
O,0,-0.493404,-1.397733,-0.153424  
N,0,0.182751,0.747441,-0.269939  
H,0,-0.773435,1.058699,-0.109862  
O,0,1.141050,1.662386,0.176169  
H,0,1.433960,2.107635,-0.628686  
O,0,-2.735180,0.278582,0.208046  
H,0,-2.200181,-0.509068,0.017482  
H,0,-3.488931,0.203075,-0.383798

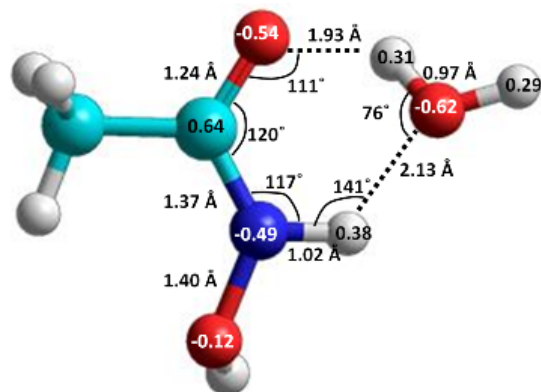

### TS2

C,0,1.800632,-0.944719,0.031084  
H,0,2.182386,-0.756036,1.038461  
H,0,2.413128,-0.376953,-0.670519  
H,0,1.862384,-2.010960,-0.183430  
C,0,0.369878,-0.514776,-0.047869  
O,0,-0.571117,-1.409950,-0.053159  
N,0,0.009542,0.749239,-0.092184  
H,0,-1.247464,0.823858,0.027856  
O,0,1.034407,1.683802,0.106010  
H,0,0.911485,2.313299,-0.615828  
O,0,-2.301798,0.215290,0.152110  
H,0,-1.593862,-0.754826,0.016559  
H,0,-2.875795,0.345202,-0.612267

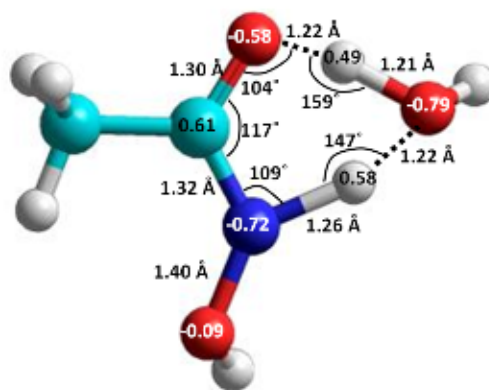

### EIW

C,0,1.884488,-0.951370,0.033875  
H,0,2.225885,-0.991917,1.072816  
H,0,2.546195,-0.283384,-0.517300  
H,0,1.924776,-1.956390,-0.387250  
C,0,0.478693,-0.450087,-0.017557  
O,0,-0.464674,-1.415448,-0.029041  
N,0,0.099667,0.782386,-0.028146  
H,0,-1.347794,-0.984166,-0.012788  
O,0,1.214221,1.653151,0.028642  
H,0,0.803080,2.511854,-0.118403  
O,0,-2.701667,0.175424,-0.060048  
H,0,-2.073328,0.904665,0.048088  
H,0,-3.349091,0.302521,0.640891

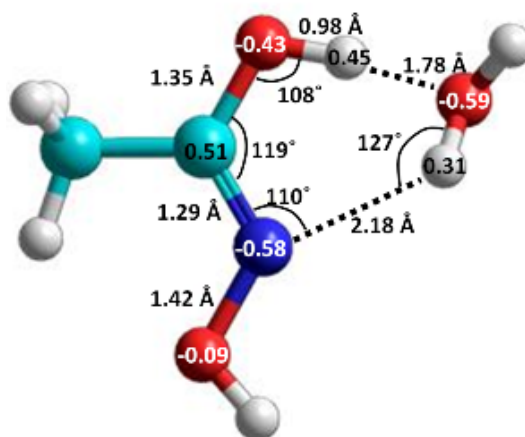

### ZA

C,0,1.763801,-0.561565,0.014572  
H,0,1.648179,-1.633605,-0.152850  
H,0,2.229136,-0.396960,0.989656  
H,0,2.416759,-0.143445,-0.753359  
C,0,0.449945,0.184785,-0.014037  
O,0,0.365703,1.405584,-0.000701  
N,0,-0.643937,-0.644696,-0.124906  
H,0,-0.564964,-1.584636,0.245320  
O,0,-1.893490,-0.091483,0.153357  
H,0,-2.330974,-0.056065,-0.705787

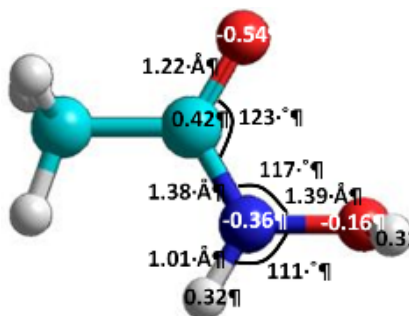

### TS3

C,0,1.094509,1.163899,-0.050418  
H,0,2.034746,1.139909,-0.600184  
H,0,1.265407,1.568301,0.953007  
H,0,0.371689,1.810950,-0.552255  
C,0,0.527482,-0.221506,0.084936  
O,0,1.110184,-1.240139,-0.212755  
N,0,-0.835094,-0.319244,0.616890  
H,0,-0.920666,0.344829,1.387683  
O,0,-1.663446,0.265323,-0.416759  
H,0,-2.209657,-0.484389,-0.678862

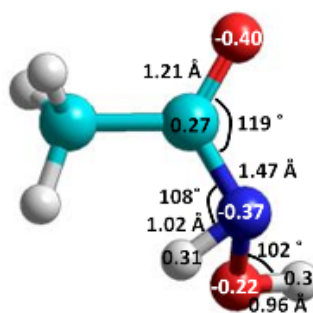

#### TS4

C,0,1.844478,-0.296317,-0.000047  
H,0,2.327514,0.120022,0.886812  
H,0,2.327569,0.120077,-0.886848  
H,0,1.959784,-1.381371,-0.000070  
C,0,0.410229,0.077202,-0.000082  
O,0,-0.025252,1.302750,-0.000335  
N,0,-0.586672,-0.779556,0.000177  
H,0,-0.515543,-1.790390,0.000396  
O,0,-1.800563,-0.188985,0.000120  
H,0,-1.105540,0.976646,-0.000188

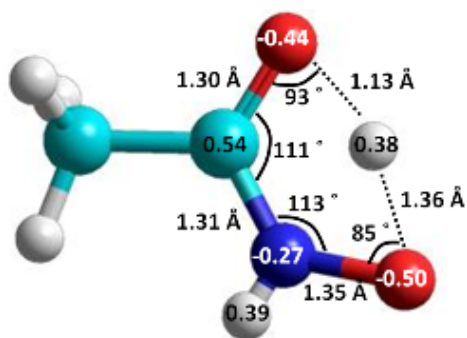

#### Z<sup>±</sup>

C,0,1.805846,-0.419411,-0.000022  
H,0,1.840982,-1.510061,-0.000079  
H,0,2.320420,-0.043081,0.887513  
H,0,2.321121,-0.042668,-0.886859  
C,0,0.401682,0.052711,-0.000007  
O,0,0.131284,1.352629,-0.000053  
N,0,-0.646534,-0.723255,0.000058  
H,0,-0.544231,-1.737030,-0.000665  
O,0,-1.855751,-0.196595,0.000037  
H,0,-0.861986,1.347557,-0.000010

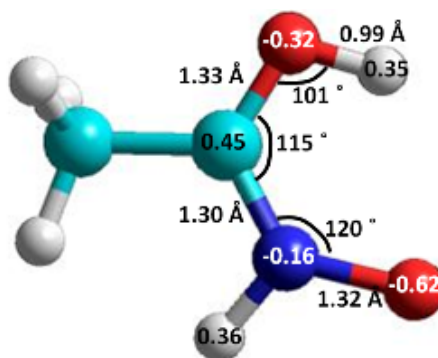

#### TS5

C,0,1.843425,-0.402827,0.011042  
H,0,2.327230,-0.013502,0.910063  
H,0,2.358974,0.003020,-0.863011  
H,0,1.903256,-1.490933,-0.000221  
C,0,0.423411,0.023363,-0.006164  
O,0,0.123509,1.306916,0.003022  
N,0,-0.566458,-0.813710,-0.108909  
H,0,-1.410587,-1.317526,0.424443  
O,0,-1.870601,-0.149365,-0.008504  
H,0,-0.874923,1.276392,0.049258

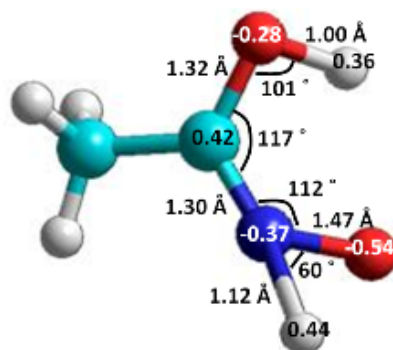

#### ZI

C,0,0.486752,1.805250,0.007019  
H,0,1.576315,1.824943,0.010181  
H,0,0.107724,2.306423,0.901252  
H,0,0.114980,2.340341,-0.870645  
C,0,0.006251,0.396005,-0.021339  
O,0,-1.333644,0.245748,-0.025538  
H,0,-1.505162,-0.709870,0.012921  
N,0,0.845400,-0.583847,-0.048924  
O,0,0.120059,-1.805967,-0.115963  
H,0,0.775543,-2.459594,0.151033

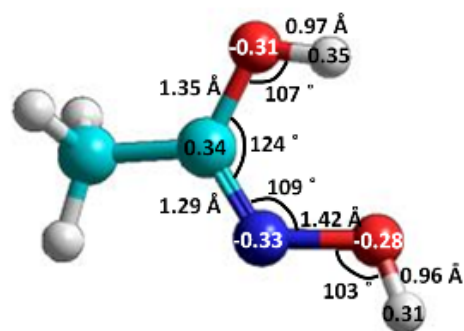

C,0,2.375518,-0.822141,0.284060  
H,0,2.167948,-1.832427,-0.071584  
H,0,2.613293,-0.855166,1.349153  
H,0,3.236429,-0.414058,-0.250132  
C,0,1.207946,0.101451,0.084426  
O,0,1.166789,1.275783,0.452719  
N,0,0.104357,-0.462807,-0.504006  
H,0,0.245462,-1.139873,-1.246245  
O,0,-0.901113,0.451584,-0.850760  
H,0,-0.498187,1.303199,-0.584906  
O,0,-3.250249,-0.286079,0.634273  
H,0,-2.469492,-0.040196,0.116590  
H,0,-3.650159,-0.987999,0.114390

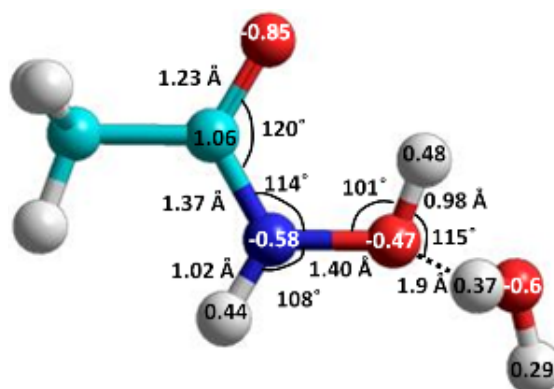

C,0,-2.44445,0.695935,0.345954  
H,0,-2.36484,1.747179,0.065927  
H,0,-2.64458,0.617658,1.416761  
H,0,-3.27253,0.235001,-0.197005  
C,0,-1.19135,-0.031289,0.030832  
O,0,-1.00015,-1.289339,0.261796  
N,0,-0.12981,0.523634,-0.517375  
H,0,-0.02567,1.478802,-0.837671  
O,0,0.875523,-0.369504,-0.716242  
H,0,0.06545,-1.25777,-0.182307  
O,0,3.232528,0.242185,0.581028  
H,0,2.398591,0.045364,0.112806  
H,0,3.703819,0.813721,-0.030259

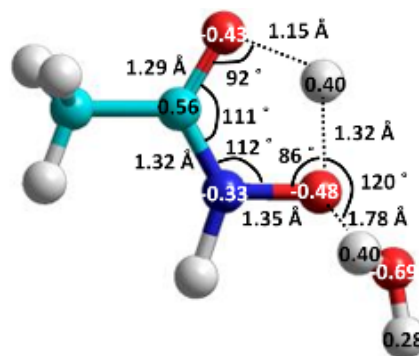

C,0,-2.377097,-0.841066,0.263258  
H,0,-2.172825,-1.878052,-0.007213  
H,0,-3.217263,-0.470838,-0.328990  
H,0,-2.646398,-0.788858,1.320748  
C,0,-1.187247,0.005834,0.015520  
O,0,-1.224091,1.299921,0.290111  
N,0,-0.058607,-0.427683,-0.469320  
H,0,0.065053,-1.405834,-0.724256  
O,0,0.938987,0.426071,-0.661247  
H,0,-0.317030,1.595774,0.019428  
O,0,3.274543,-0.254754,0.539980  
H,0,2.428750,-0.032815,0.093928  
H,0,3.740517,-0.784096,-0.111827

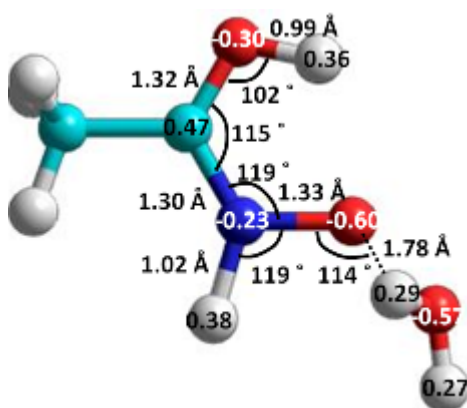

## 9

C,0,1.815871,1.260230,-0.008283  
 H,0,1.191927,2.152673,-0.048385  
 H,0,2.475639,1.234686,-0.878721  
 H,0,2.431187,1.280864,0.894086  
 C,0,0.972571,0.038484,0.002028  
 O,0,1.594838,-1.136314,0.051004  
 N,0,-0.312611,0.086942,-0.052502  
 H,0,-1.161113,0.840376,-0.020448  
 O,0,-1.025923,-1.085747,-0.035832  
 H,0,0.906497,-1.825236,0.083152  
 O,0,-2.578626,0.687905,0.145420  
 H,0,-1.987926,-0.529111,0.033439  
 H,0,-3.105978,0.921494,-0.624657

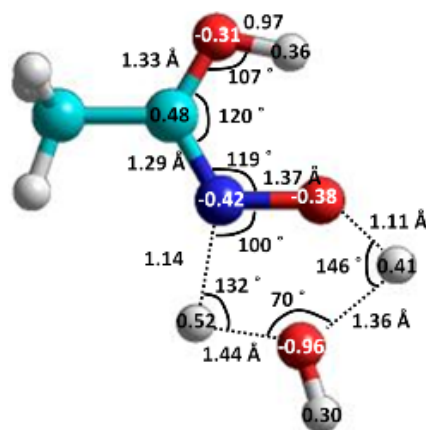

# ZIW

C,0,2.129669,1.515199,-0.044417  
 H,0,2.847986,1.419107,-0.862986  
 H,0,2.685639,1.559015,0.895762  
 H,0,1.555091,2.432514,-0.172148  
 C,0,1.211843,0.342461,-0.035329  
 O,0,1.809620,-0.858063,0.124264  
 N,0,-0.061722,0.492747,-0.181589  
 H,0,-3.763897,0.377159,-0.316332  
 O,0,-0.682436,-0.779295,-0.171859  
 H,0,1.086970,-1.508197,0.158918  
 O,0,-3.333973,-0.283002,0.237065  
 H,0,-1.624136,-0.566909,-0.014690  
 H,0,-3.631525,-0.067505,1.126921

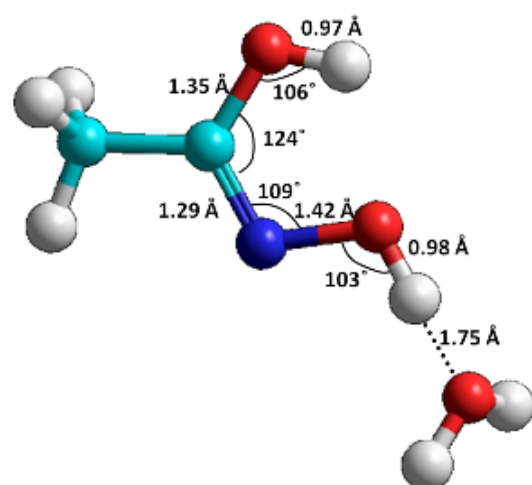

## Section S2

Using MP2-PCM/6-311++G(d,p) results:

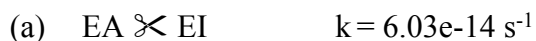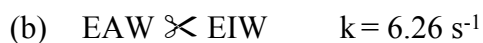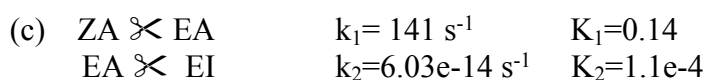

Since the first step is a fast equilibrium, the pre-equilibrium approximation can be applied:

$$R = k_2 [\text{EA}] = k_2 K_1 [\text{ZA}]$$

$$k_{\text{eff}} = k_2 K_1 = 8.44\text{e-}15 \text{ s}^{-1}$$

Estimate of water-assisted (c) mechanism:

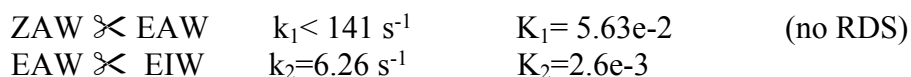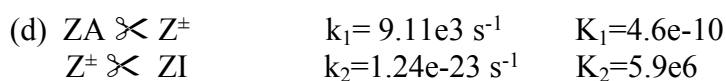

Since the first step is a fast equilibrium, the pre-equilibrium approximation can be applied

$$R = k_2 [\text{Z}^\pm] = k_2 K_1 [\text{ZA}]$$

$$k_{\text{eff}} = k_2 K_1 = 5.70\text{e-}33 \text{ s}^{-1}$$

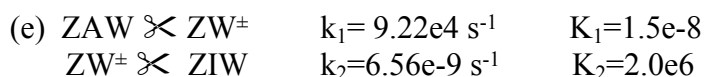

Since the first step is a fast equilibrium, the pre-equilibrium approximation can be applied

$$k_{\text{eff}} = k_2 K_1 = 9.84\text{e-}17 \text{ s}^{-1}$$

**Most favourable process from a kinetic point of view:**

E-Amide  $\rightleftharpoons$  E-Imide

Followed by: Z-Amide  $\rightleftharpoons$  E-Imide
